# Supplementary material for: Ligand induced structure and property changes of 1T-MoS2
Source: Royal Society of Chemistry journal article supplement (doi:10.1039/c9cp00917e), 2019-01-01
Supplement: c9cp00917e1.pdf [file c9cp00917e1.pdf]

## Supporting Information

### Ligand Induced Structure and Property Change of 1T-MoS<sub>2</sub>

Yaoyao Linghu,<sup>a</sup> Na Li,<sup>a</sup> Yaping Du<sup>b\*</sup> and Chao Wu<sup>b\*</sup>

*E-mails: chaowu@xjtu.edu.cn , ypdu@nankai.edu.cn*

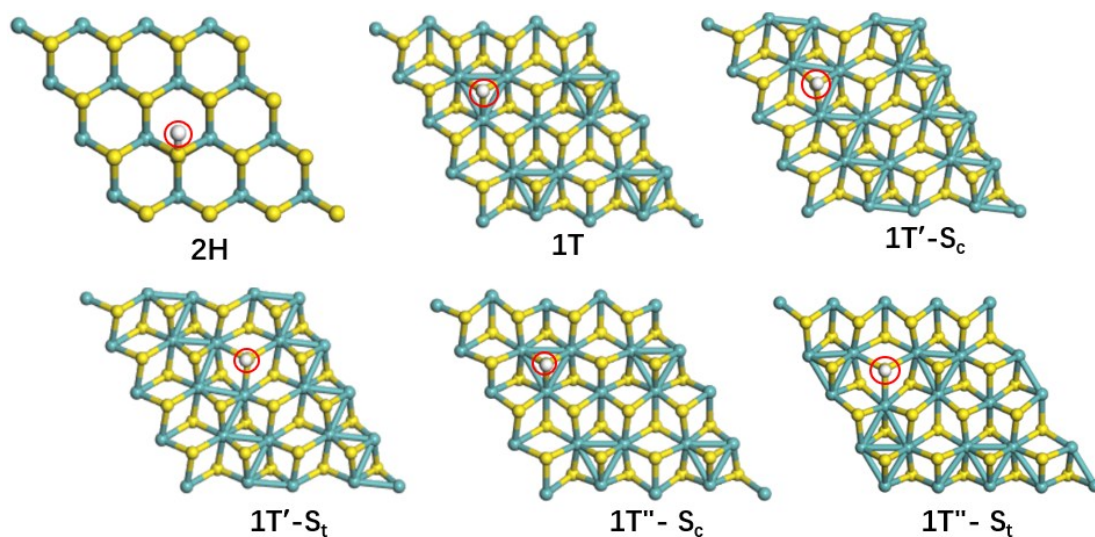

**Figure S1.** Optimized structures of single H atom adsorbed MoS<sub>2</sub> monolayers. The H atoms (white balls) are highlighted with red circles.

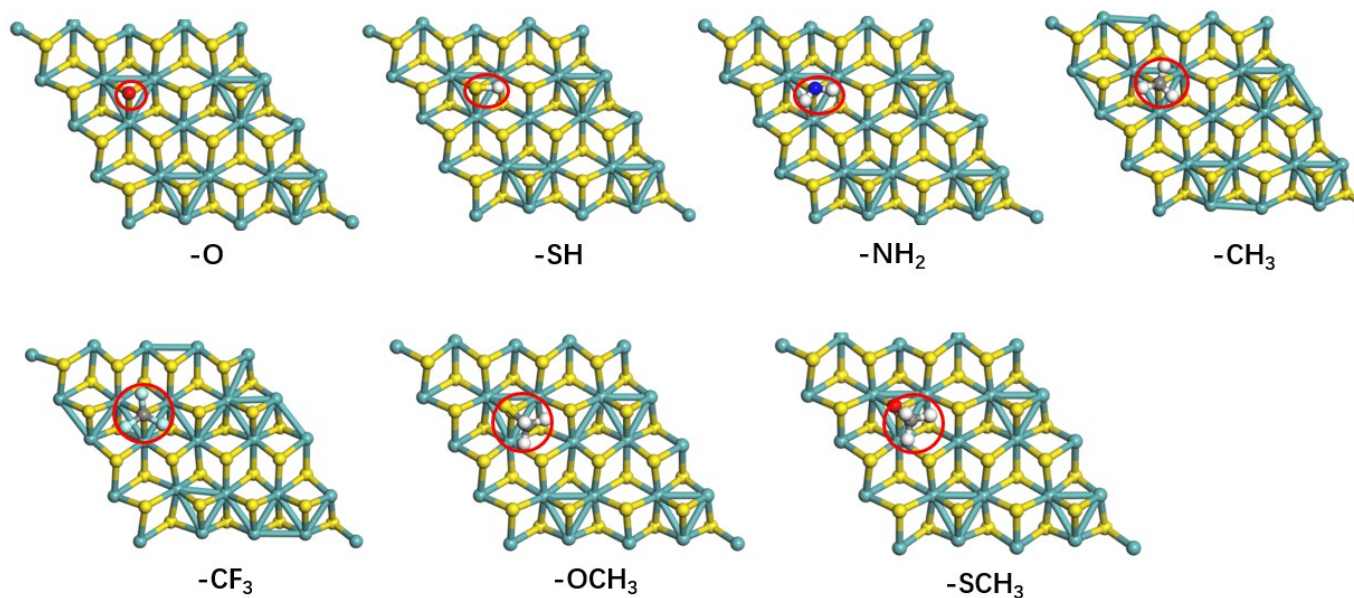

**Figure S2.** Optimized structures of single functional group (-O, -SH, -NH<sub>2</sub>, -CH<sub>3</sub>, -CF<sub>3</sub>, OCH<sub>3</sub> and SCH<sub>3</sub>) adsorbed 1T-MoS<sub>2</sub> monolayers. The functional groups are

highlighted with red circles.

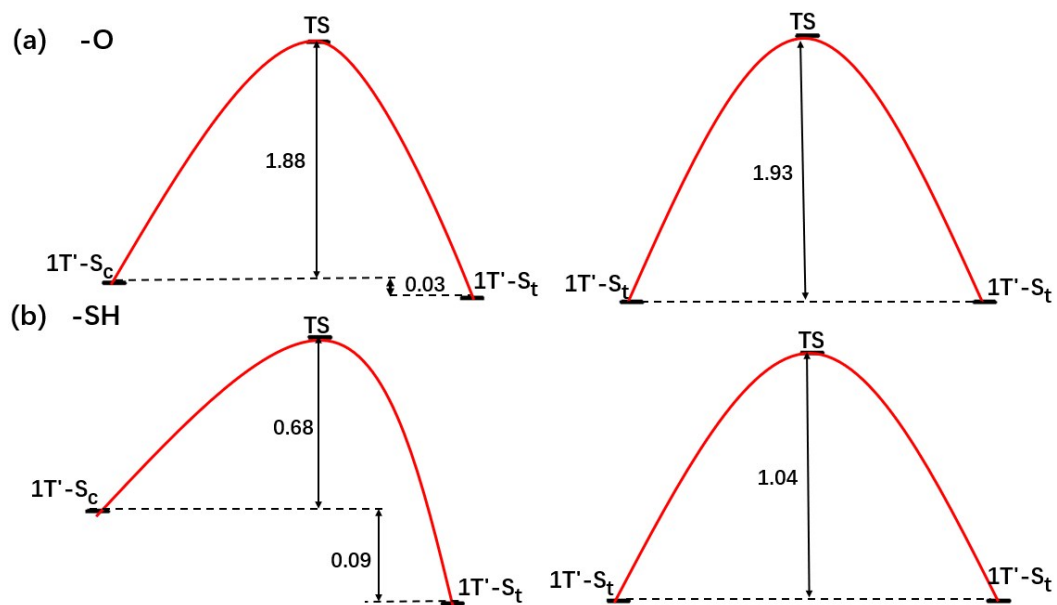

**Figure S3.** The functional groups (a) -O and (b) -SH diffusion energy (eV) profiles from S<sub>c</sub> to S<sub>t</sub> and from S<sub>t</sub> to S<sub>c</sub>.

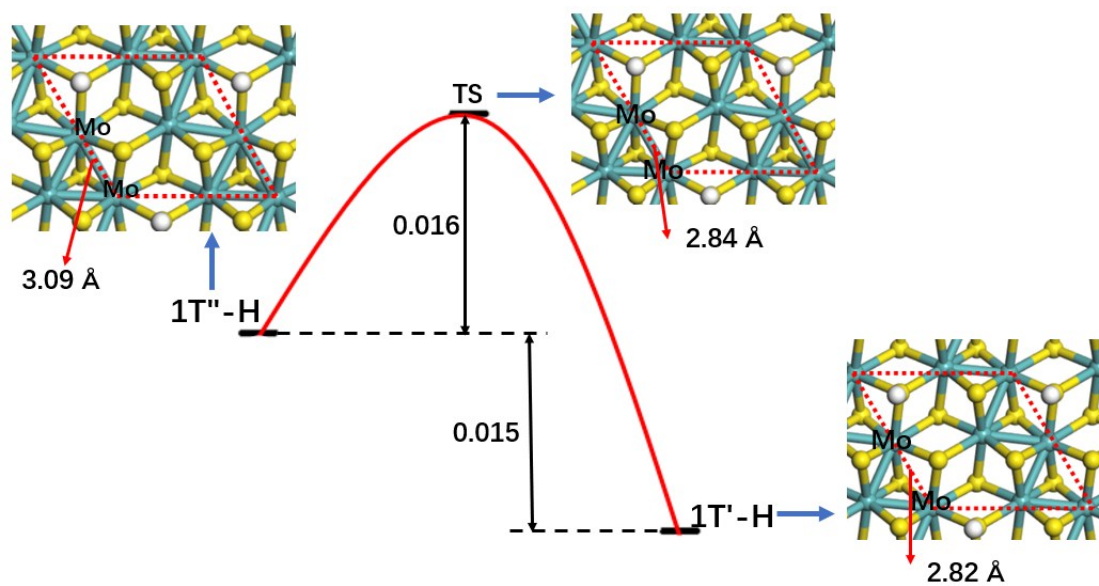

**Figure S4.** Minimum energy pathways of the phase transition  $1T'' \rightarrow 1T'$  with an adsorbed H atom. The energy barrier (eV f.u.<sup>-1</sup>) is given. TS denotes the transition states. The computed supercell is marked by red dashed parallelograms. The Mo-Mo distance that distinguishes the  $2H$  and  $1T'$  phases is indicated by the red arrow.

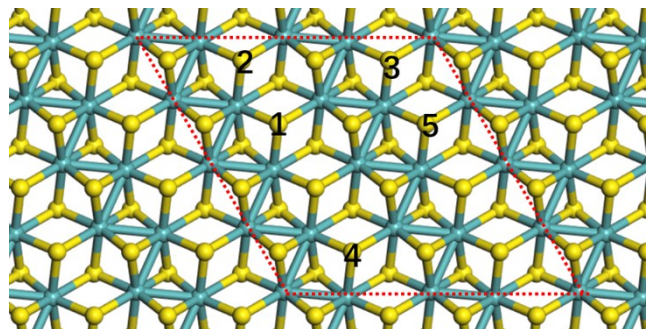

**Figure S5.** Configurations of two functional groups adsorbed on  $1T'$ - $\text{MoS}_2$  monolayers. The number represents the adsorption site. (1,2), (1,3), (1,4) and (1,5) correspond to 1NN, 2NN, 3NN and 4NN with two adsorbed H atoms (one at site 1 and the other at sites 2, 3, 4 and 5, respectively). The computed supercell ( $4 \times 4$ ) is marked by red dashed parallelograms.

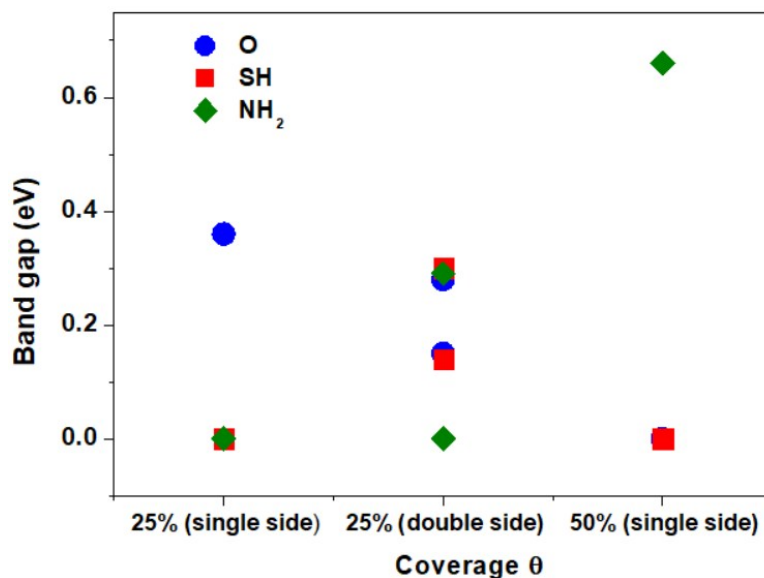

**Figure S6.** Calculated band gaps of the  $1T'$ - $\text{MoS}_2$  monolayer adsorbed with different functional groups.

**Table S1.** The adsorption energy of one functional group on 1T'-MoS<sub>2</sub> with the PBE potential and the vdW correction (DFT-D3).

| Structure          | MoS <sub>2</sub> -H | MoS <sub>2</sub> -O | MoS <sub>2</sub> -SH | MoS <sub>2</sub> -NH <sub>2</sub> | MoS <sub>2</sub> -CH <sub>3</sub> |
|--------------------|---------------------|---------------------|----------------------|-----------------------------------|-----------------------------------|
| $E_{ad}$ (eV)      | -0.15               | -0.83               | -1.86                | -2.67                             | -2.58                             |
| $E_{ad}$ -Vdw (eV) | -0.13               | -0.98               | -2.21                | -3.19                             | -2.93                             |

| Structure          | MoS <sub>2</sub> -CF <sub>3</sub> | MoS <sub>2</sub> -OCH <sub>3</sub> | MoS <sub>2</sub> -SCH <sub>3</sub> |
|--------------------|-----------------------------------|------------------------------------|------------------------------------|
| $E_{ad}$ (eV)      | -1.79                             | -1.66                              | -1.50                              |
| $E_{ad}$ -Vdw (eV) | -2.15                             | -2.04                              | -2.05                              |

**Table S2.** The adsorption energy of two H atoms adsorbed on 1T'-MoS<sub>2</sub> with the PBE potential and the vdW correction (DFT-D3).

| Structure          | 1NN   | 2NN   | 3NN   | 4NN   |
|--------------------|-------|-------|-------|-------|
| $E_{ad}$ (eV)      | -0.11 | -0.27 | -0.22 | -0.13 |
| $E_{ad}$ -Vdw (eV) | -0.08 | -0.24 | -0.19 | -0.11 |

**Table S3.** The adsorption energy  $E_{ad}$  and distance  $d_{\text{functional-group}}$  between two functional groups adsorbed on 1T'-MoS<sub>2</sub>.

| Structure-2O | $E_{ad}$ (eV) | $d_{\text{O-O}}$ (Å) |
|--------------|---------------|----------------------|
| 1NN          | -1.97         | 3.14                 |
| 2NN          | -1.96         | 5.74                 |
| 3NN          | -1.96         | 6.35                 |
| 4NN          | -1.95         | 6.53                 |

  

| Structure-2SH | $E_{ad}$ (eV) | $d_{\text{SH-SH}}$ (Å) |
|---------------|---------------|------------------------|
| 1NN           | -4.26         | 3.70                   |
| 2NN           | -4.43         | 5.72                   |
| 3NN           | -4.30         | 6.23                   |
| 4NN           | -4.31         | 6.42                   |

  

| Structure-2NH <sub>2</sub> | $E_{ad}$ (eV) | $d_{\text{NH}_2-\text{NH}_2}$ (Å) |
|----------------------------|---------------|-----------------------------------|
| 1NN                        | -5.66         | 3.19                              |
| 2NN                        | -5.66         | 4.83                              |
| 3NN                        | -5.62         | 6.38                              |
| 4NN                        | -5.61         | 6.55                              |

| Structure-CH <sub>3</sub> | $E_{\text{ad}}$ (eV) | $d_{\text{CH}_3-\text{CH}_3}$ (Å) |
|---------------------------|----------------------|-----------------------------------|
| 1NN                       | -5.64                | 3.57                              |
| 2NN                       | -5.82                | 5.74                              |
| 3NN <sup>1</sup>          | -5.75                | 6.31                              |
| 3NN <sup>2</sup>          | -5.79                | 6.54                              |

| Structure-2CF <sub>3</sub> | $E_{\text{ad}}$ (eV) | $d_{\text{CF}_3-\text{CF}_3}$ (Å) |
|----------------------------|----------------------|-----------------------------------|
| 1NN                        | -3.97                | 3.82                              |
| 2NN                        | -4.29                | 5.73                              |
| 3NN                        | -4.17                | 6.33                              |
| 4NN                        | -4.23                | 6.55                              |

| Structure-2OCH <sub>3</sub> | $E_{\text{ad}}$ (eV) | $d_{\text{OCH}_3-\text{OCH}_3}$ (Å) |
|-----------------------------|----------------------|-------------------------------------|
| 1NN                         | -3.94                | 3.30                                |
| 2NN                         | -4.06                | 5.72                                |
| 3NN                         | -4.01                | 6.39                                |
| 4NN                         | -4.03                | 6.54                                |

| Structure-2SCH <sub>3</sub> | $E_{\text{ad}}$ (eV) | $d_{\text{SCH}_3-\text{SCH}_3}$ (Å) |
|-----------------------------|----------------------|-------------------------------------|
| 1NN                         | -3.80                | 3.58                                |
| 2NN                         | -4.08                | 5.74                                |
| 3NN                         | -3.95                | 6.38                                |
| 4NN                         | -4.04                | 6.55                                |
